# Supplementary material for: Antioxidants into Nopal (Opuntia ficus-indica), Important Inhibitors of Free Radicals’ Formation
Source: MDPI journal article supplement (doi:10.3390/antiox10122006), 2021-12-16
Supplement: s1 [file s1]

## Supplementary Materials

### Antioxidants into Nopal (*Opuntia ficus-indica*), important inhibitors of free radicals' formation.

Romina Castañeda-Arriaga,<sup>1</sup> Adriana Perez-Gonzalez,<sup>2</sup> Tiziana Marino,<sup>\*3</sup> Nino Russo,<sup>3</sup> Annia Galano,<sup>1</sup>

<sup>1</sup>*Departamento de Química. Universidad Autónoma Metropolitana-Iztapalapa. San Rafael Atlixco 186, Col. Vicentina. Iztapalapa. C. P. 09340. México D. F. México.*

<sup>2</sup>*CONACYT, Universidad Autónoma Metropolitana, Iztapalapa, San Rafael Atlixco 186, Col. Vicentina. Iztapalapa. C. P. 09340. México D. F. México.*

<sup>3</sup>*Dipartimento di Chimica e Tecnologie Chimiche, Università della Calabria, I-87036 Arcavacata di Rende, Italy*

#### Table of Contents

|                                                                                                                                                                                                                                            |    |
|--------------------------------------------------------------------------------------------------------------------------------------------------------------------------------------------------------------------------------------------|----|
| <b>Figure S1.</b> Phenolic and poliphenolic compounds in Nopal ( <i>Opuntia ficus-indica</i> ). .....                                                                                                                                      | 3  |
| <b>Figure S2.</b> Deprotonation routes of PhAs.....                                                                                                                                                                                        | 4  |
| <b>Table S1.</b> Chelation routes (ChR), chelation sites (ChS), conditional Gibbs free energies of reaction ( $\Delta G^\circ$ , at pH=7.4, in kcal/mol), and Maxwell-Boltzmann distribution (%MB) for the chelation pathways of PhAs..... | 5  |
| <b>Figure S3.</b> Energy scan for the <i>f</i> -HAT reactions between $\cdot\text{OH}$ and PhAs-Cu(II) at 298.15 K. Solvent=water. ....                                                                                                    | 24 |
| <b>Table S2.</b> Gibbs free energy of reaction ( $\Delta G$ , kcal/mol) and Gibbs free energy of activation ( $\Delta G^\ddagger$ , kcal/mol) for the direct RAF mechanism between PhAs-Cu(II) and $\cdot\text{OH}$ . Solvent=water. ....  | 25 |
| <b>Figure S4.</b> Transition states structures of exergonic RAF reactions between $\cdot\text{OH}$ and $\text{H}_{n-2}\text{COA}^{2-}$ - (2)-C2 at 298.15 K. Solvent=water. ....                                                           | 26 |

|                                                                                                                                                                                                  |    |
|--------------------------------------------------------------------------------------------------------------------------------------------------------------------------------------------------|----|
| <b>Figure S5.</b> Transition states structures of exergonic RAF reactions between $\cdot\text{OH}$ and $\text{H}_{\text{n}-2}\text{FLA}^{2-}$ -(2)-C5 complexes at 298.15 K. Solvent=water. .... | 27 |
| <b>Figure S6.</b> Transition states structures of exergonic RAF reactions between $\cdot\text{OH}$ and $\text{H}_{\text{n}-2}\text{FLA}^{2-}$ -(2)-C2 complexes at 298.15 K. Solvent=water. .... | 28 |
| <b>Figure S7.</b> Transition states structures of exergonic RAF reactions between $\cdot\text{OH}$ and $\text{H}_{\text{n}-2}\text{PRA}^{2-}$ -(2)-C7 complexes at 298.15 K. Solvent=water. .... | 29 |
| <b>Figure S8.</b> Transition states structures of exergonic RAF reactions between $\cdot\text{OH}$ and $\text{H}_{\text{n}-2}\text{GAA}^{2-}$ -(2)-C7 complexes at 298.15 K. Solvent=water. .... | 30 |

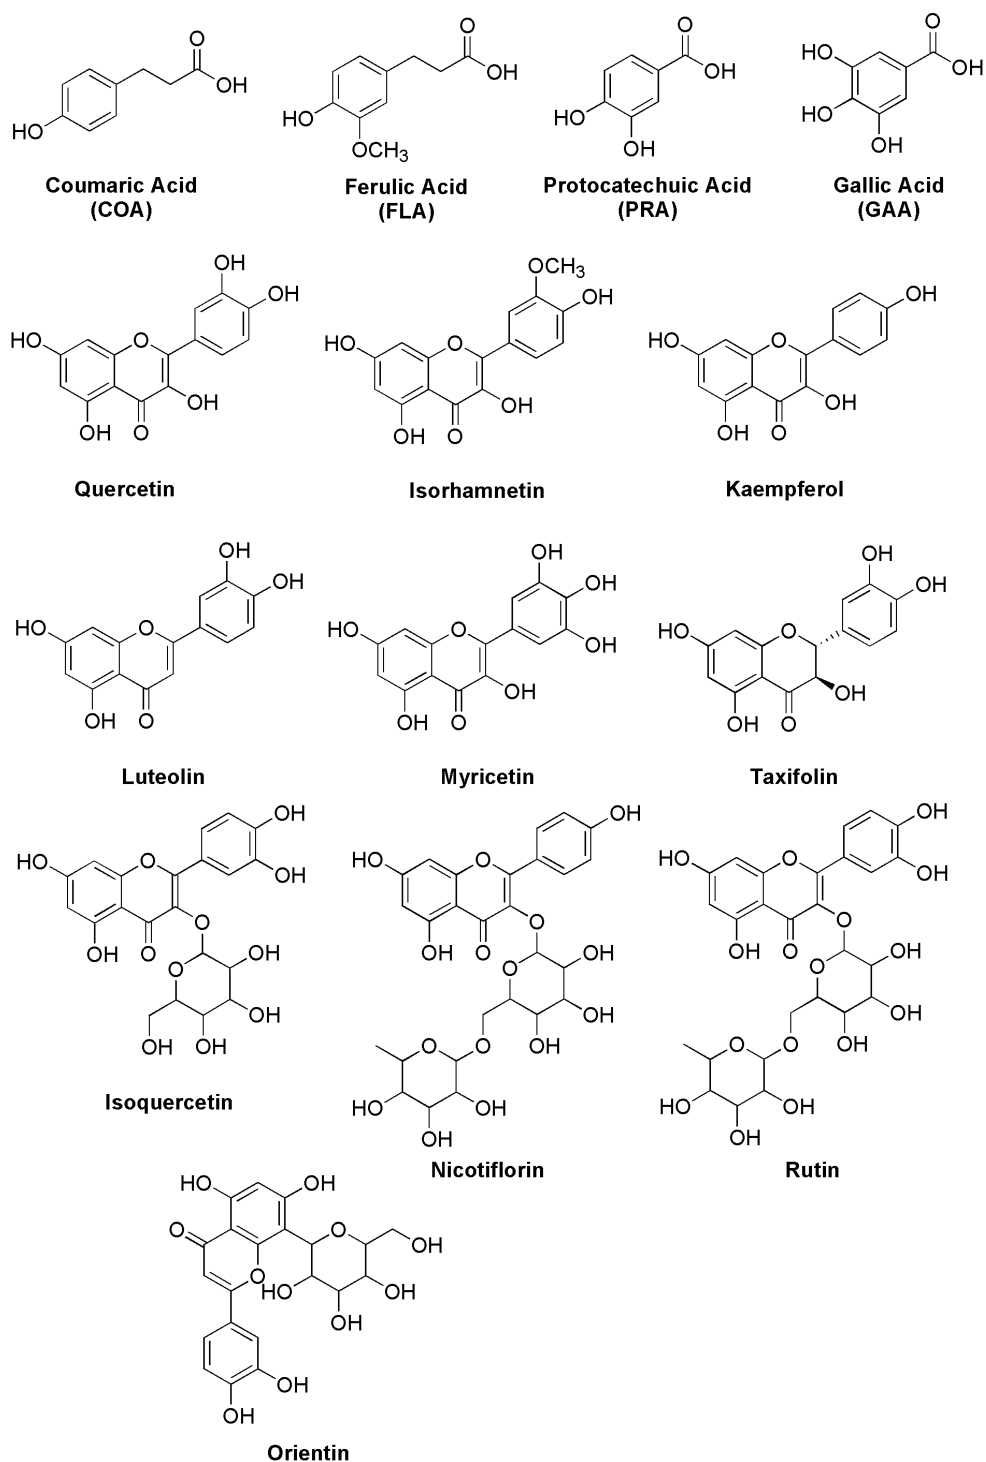

**Figure S1.** Phenolic and polyphenolic compounds in Nopal (*Opuntia ficus-indica*).

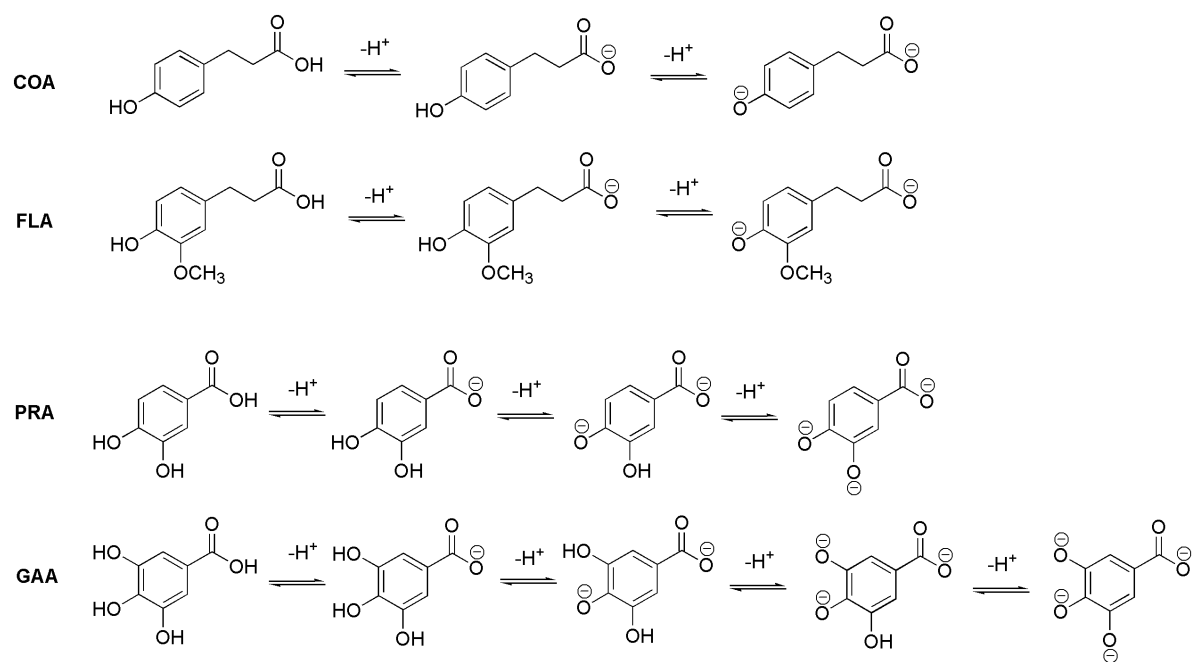

**Figure S2.** Deprotonation routes of PhAs

**Table S1.** Chelation routes (ChR), chelation sites (ChS), conditional Gibbs free energies of reaction ( $\Delta G'$ , at pH=7.4, in kcal/mol), and Maxwell-Boltzmann distribution (%MB) for the chelation pathways of PhAs.

| Complex                  | ChS | ChR | $\Delta G$ | %MB | Structure                                                                            | 3D View                                                                               |
|--------------------------|-----|-----|------------|-----|--------------------------------------------------------------------------------------|---------------------------------------------------------------------------------------|
| H <sub>n</sub> COA(1)-C1 | CO  | I   | 3.06       | 0   | 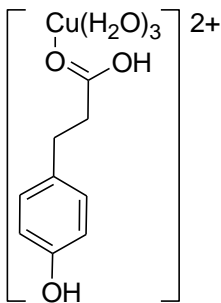   |    |
| H <sub>n</sub> COA(1)-C2 | CO  | II  | -11.19     | 0   |   |   |
| H <sub>n</sub> COA(2)-C3 | COO | II  | -15.51     | 0   |  |  |

|                                    |     |     |        |   |                                                                                      |                                                                                       |
|------------------------------------|-----|-----|--------|---|--------------------------------------------------------------------------------------|---------------------------------------------------------------------------------------|
| $H_n\text{COA(1)-C4}$              | OH  | I   | 7.13   | 0 | 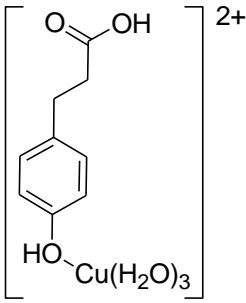   |    |
| $H_n\text{COA(1)-C5}$              | OH  | II  | -6.34  | 0 |    |    |
|                                    |     |     |        |   |                                                                                      |                                                                                       |
| $H_{n-1}\text{COA}^-(1)\text{-C1}$ | CO  | III | -10.80 | 0 |  |  |
| $H_{n-1}\text{COA}^-(2)\text{-C2}$ | COO | III | -15.11 | 0 |  |  |

|                          |     |     |        |      |                                                                                      |                                                                                       |
|--------------------------|-----|-----|--------|------|--------------------------------------------------------------------------------------|---------------------------------------------------------------------------------------|
| $H_{n-1}COA^-$ (1)-C3    | OH  | III | 5.55   | 0    | 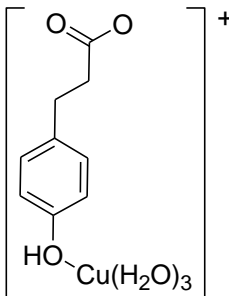   |    |
| $H_{n-1}COA^-$ (1)-C4    | OH  | IV  | -5.93  | 0    |    |    |
|                          |     |     |        |      |                                                                                      |                                                                                       |
| $H_{n-2}COA^{2-}$ (1)-C1 | CO  | V   | -12.99 | 0    |  |  |
| $H_{n-2}COA^{2-}$ (2)-C2 | COO | V   | -22.87 | ~100 |  |  |

|                          |     |    |        |      |                                                                                      |                                                                                       |
|--------------------------|-----|----|--------|------|--------------------------------------------------------------------------------------|---------------------------------------------------------------------------------------|
| $H_{n-2}COA^{2-}$ (1)-C3 | OH  | V  | -12.77 | 0    | 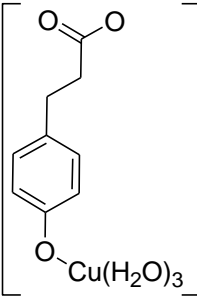   |    |
| $H_nFLA(1)$ -C1          | CO  | I  | 2.51   | 0    |    |    |
| $H_nFLA(1)$ -C2          | CO  | II | -10.99 | 0    |  |  |
| $H_nFLA(2)$ -C3          | COO | II | -15.43 | 0.14 |  |  |



|                           |                         |    |       |   |                                                                                      |                                                                                       |
|---------------------------|-------------------------|----|-------|---|--------------------------------------------------------------------------------------|---------------------------------------------------------------------------------------|
| H <sub>n</sub> FLA (1)-C4 | OH                      | I  | 7.50  | 0 | 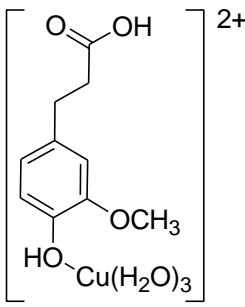   |    |
| H <sub>n</sub> FLA (1)-C5 | OH                      | II | -6.35 | 0 |    |    |
| H <sub>n</sub> FLA (1)-C6 | OCH <sub>3</sub>        | I  | 7.05  | 0 |  |  |
| H <sub>n</sub> FLA (2)-C7 | OH,<br>OCH <sub>3</sub> | I  | 4.40  | 0 |  |  |

|                      |                         |     |        |      |                                                                                      |                                                                                       |
|----------------------|-------------------------|-----|--------|------|--------------------------------------------------------------------------------------|---------------------------------------------------------------------------------------|
| $H_nFLA(2)-C8$       | OH,<br>OCH <sub>3</sub> | II  | -13.23 | 0    | 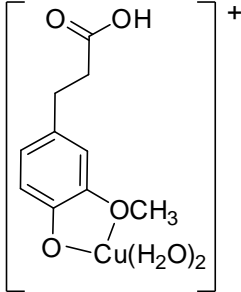   |    |
|                      |                         |     |        |      |                                                                                      |                                                                                       |
| $H_{n-1}FLA^-(1)-C1$ | CO                      | III | -9.96  | 0    |    |    |
| $H_{n-1}FLA^-(2)-C2$ | COO                     | III | -14.40 | 0.03 |  |  |
| $H_{n-1}FLA^-(1)-C3$ | OH                      | III | 6.28   | 0    |  |  |

|                       |                |     |       |   |                                                                                                                                                                                                                                                                                                                                                                                                                                                                                                                       |                                                                                                                                                                                                                                                                                                                                                      |
|-----------------------|----------------|-----|-------|---|-----------------------------------------------------------------------------------------------------------------------------------------------------------------------------------------------------------------------------------------------------------------------------------------------------------------------------------------------------------------------------------------------------------------------------------------------------------------------------------------------------------------------|------------------------------------------------------------------------------------------------------------------------------------------------------------------------------------------------------------------------------------------------------------------------------------------------------------------------------------------------------|
| $H_{n-1}FLA^- (1)-C4$ | OH             | IV  | -5.92 | 0 | 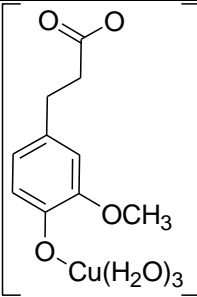 <p>Chemical structure of <math>H_{n-1}FLA^- (1)-C4</math> complex. The structure shows a central copper atom coordinated by three water molecules (<math>H_2O</math>) and a phenolate ligand. The phenolate ligand is substituted with a methoxy group (<math>OCH_3</math>) and a propionic acid side chain (<math>CH_2CH_2COOH</math>). The copper atom is coordinated to the phenolate oxygen and the three water molecules.</p> |  <p>3D ball-and-stick model of the <math>H_{n-1}FLA^- (1)-C4</math> complex. The structure shows the spatial arrangement of the copper atom, water molecules, and the phenolate ligand. Bond lengths are indicated: 1.919 Å, 2.102 Å, 2.120 Å, and 2.055 Å.</p>   |
| $H_{n-1}FLA^- (1)-C5$ | $OCH_3$        | III | 6.22  | 0 |  <p>Chemical structure of <math>H_{n-1}FLA^- (1)-C5</math> complex. The structure shows a central copper atom coordinated by three water molecules (<math>H_2O</math>) and a phenolate ligand. The phenolate ligand is substituted with a methoxy group (<math>OCH_3</math>) and a propionic acid side chain (<math>CH_2CH_2COOH</math>). The copper atom is coordinated to the phenolate oxygen and the three water molecules.</p> |  <p>3D ball-and-stick model of the <math>H_{n-1}FLA^- (1)-C5</math> complex. The structure shows the spatial arrangement of the copper atom, water molecules, and the phenolate ligand. Bond lengths are indicated: 2.460 Å, 1.980 Å, 2.025 Å, and 2.082 Å.</p>   |
| $H_{n-1}FLA^- (2)-C6$ | OH,<br>$OCH_3$ | III | 3.13  | 0 |  <p>Chemical structure of <math>H_{n-1}FLA^- (2)-C6</math> complex. The structure shows a central copper atom coordinated by two water molecules (<math>H_2O</math>) and a phenolate ligand. The phenolate ligand is substituted with a methoxy group (<math>OCH_3</math>) and a propionic acid side chain (<math>CH_2CH_2COOH</math>). The copper atom is coordinated to the phenolate oxygen and the two water molecules.</p>    |  <p>3D ball-and-stick model of the <math>H_{n-1}FLA^- (2)-C6</math> complex. The structure shows the spatial arrangement of the copper atom, water molecules, and the phenolate ligand. Bond lengths are indicated: 2.308 Å, 1.973 Å, 2.045 Å, and 2.087 Å.</p>  |
| $H_{n-1}FLA^- (2)-C7$ | OH,<br>$OCH_3$ | IV  | -12.4 | 0 |  <p>Chemical structure of <math>H_{n-1}FLA^- (2)-C7</math> complex. The structure shows a central copper atom coordinated by two water molecules (<math>H_2O</math>) and a phenolate ligand. The phenolate ligand is substituted with a methoxy group (<math>OCH_3</math>) and a propionic acid side chain (<math>CH_2CH_2COOH</math>). The copper atom is coordinated to the phenolate oxygen and the two water molecules.</p>   |  <p>3D ball-and-stick model of the <math>H_{n-1}FLA^- (2)-C7</math> complex. The structure shows the spatial arrangement of the copper atom, water molecules, and the phenolate ligand. Bond lengths are indicated: 2.133 Å, 2.030 Å, 1.914 Å, and 2.119 Å.</p> |
|                       |                |     |       |   |                                                                                                                                                                                                                                                                                                                                                                                                                                                                                                                       |                                                                                                                                                                                                                                                                                                                                                      |

|                          |                  |   |        |       |                                                                                      |                                                                                       |
|--------------------------|------------------|---|--------|-------|--------------------------------------------------------------------------------------|---------------------------------------------------------------------------------------|
| $H_{n-2}FLA^{2-}$ (1)-C1 | CO               | V | -12.08 | 0     | 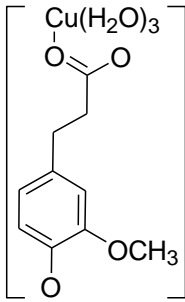   |    |
| $H_{n-2}FLA^{2-}$ (2)-C2 | COO              | V | -18.30 | 18.21 |    |    |
| $H_{n-2}FLA^{2-}$ (1)-C3 | OH               | V | -12.67 | 0     |   |   |
| $H_{n-2}FLA^{2-}$ (1)-C4 | OCH <sub>3</sub> | V | -3.50  | 0     |  |  |

|                          |                         |    |        |       |                                                                                      |                                                                                       |
|--------------------------|-------------------------|----|--------|-------|--------------------------------------------------------------------------------------|---------------------------------------------------------------------------------------|
| $H_{n-2}FLA^{2-}$ (2)-C5 | OH,<br>OCH <sub>3</sub> | V  | -19.19 | 81.61 | 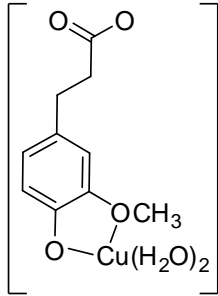   |    |
| $H_nPRA(1)$ -C1          | CO                      | I  | 2.05   | 0     |    |    |
| $H_nPRA(1)$ -C2          | CO                      | II | -13.54 | 0     |   |   |
| $H_nPRA(2)$ -C3          | COO                     | II | -16.57 | 0     |  |  |
| $H_nPRA(1)$ -C4          | OH (3)                  | I  | 5.51   | 0     |  |  |

|                            |                   |    |        |   |                                                                                      |                                                                                       |
|----------------------------|-------------------|----|--------|---|--------------------------------------------------------------------------------------|---------------------------------------------------------------------------------------|
| H <sub>n</sub> PRA (1)-C5  | OH (3)            | II | -9.26  | 0 | 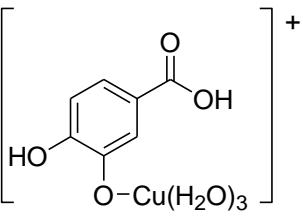   |    |
| H <sub>n</sub> PRA (1)-C6  | OH (4)            | I  | 5.74   | 0 |    |    |
| H <sub>n</sub> PRA (1)-C7  | OH (4)            | II | -9.33  | 0 |   |   |
| H <sub>n</sub> PRA (2)-C8  | OH (3),<br>OH (4) | I  | 3.55   | 0 |  |  |
| H <sub>n</sub> PRA (2)-C9  | OH (3),<br>OH (4) | II | -13.04 | 0 |  |  |
| H <sub>n</sub> PRA (2)-C10 | OH (3),<br>OH (4) | II | -13.21 | 0 |  |  |

|                      |        |     |        |   |                                                                                      |                                                                                       |
|----------------------|--------|-----|--------|---|--------------------------------------------------------------------------------------|---------------------------------------------------------------------------------------|
|                      |        |     |        |   |                                                                                      |                                                                                       |
| $H_{n-1}PRA^-(1)-C1$ | CO     | III | -11.19 | 0 | 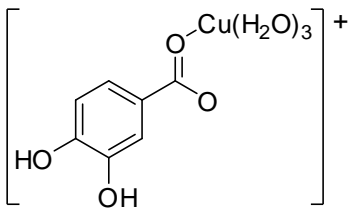   |    |
| $H_{n-1}PRA^-(2)-C2$ | COO    | III | -14.22 | 0 |    |    |
| $H_{n-1}PRA^-(1)-C3$ | OH (3) | III | 4.30   | 0 |   |   |
| $H_{n-1}PRA^-(1)-C4$ | OH (3) | IV  | -8.77  | 0 |  |  |
| $H_{n-1}PRA^-(1)-C5$ | OH (4) | III | 6.61   | 0 |  |  |

|                         |                   |     |        |   |                                                                                      |                                                                                       |
|-------------------------|-------------------|-----|--------|---|--------------------------------------------------------------------------------------|---------------------------------------------------------------------------------------|
| $H_{n-1}PRA^-(1)-C6$    | OH (4)            | IV  | -9.58  | 0 | 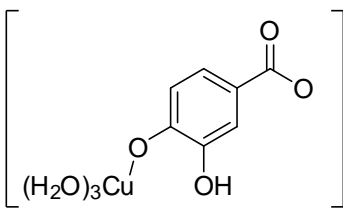   |    |
| $H_{n-1}PRA^-(2)-C7$    | OH (3),<br>OH (4) | III | 1.79   | 0 |    |    |
| $H_{n-1}PRA^-(2)-C8$    | OH (3),<br>OH (4) | IV  | -12.15 | 0 |    |    |
| $H_{n-1}PRA^-(2)-C9$    | OH (3),<br>OH (4) | IV  | -12.58 | 0 |  |  |
|                         |                   |     |        |   |                                                                                      |                                                                                       |
| $H_{n-2}PRA^{2-}(1)-C1$ | CO                | V   | -10.97 | 0 |  |  |



|                          |                   |    |        |       |                                                                                      |                                                                                       |
|--------------------------|-------------------|----|--------|-------|--------------------------------------------------------------------------------------|---------------------------------------------------------------------------------------|
| $H_{n-2}PRA^{2-}$ (2)-C2 | COO               | V  | -16.23 | 0     | 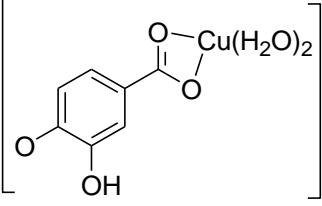   |    |
| $H_{n-2}PRA^{2-}$ (1)-C3 | OH (3)            | V  | -3.17  | 0     |    |    |
| $H_{n-2}PRA^{2-}$ (1)-C4 | OH (3)            | VI | -12.02 | 0     |   |   |
| $H_{n-2}PRA^{2-}$ (1)-C5 | OH (4)            | V  | -14.42 | 0     |  |  |
| $H_{n-2}PRA^{2-}$ (2)-C6 | OH (3),<br>OH (4) | V  | -17.42 | 0.01  |  |  |
| $H_{n-2}PRA^{2-}$ (2)-C7 | OH (3),<br>OH (4) | VI | -22.83 | 99.99 |  |  |

| H <sub>n</sub> GAA(1)-C1  | CO     | I  | 2.40   | 0    | 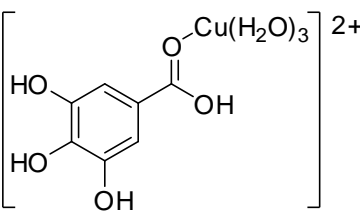   |    |
|---------------------------|--------|----|--------|------|--------------------------------------------------------------------------------------|---------------------------------------------------------------------------------------|
| H <sub>n</sub> GAA (1)-C2 | CO     | II | -13.70 | 0    |    |    |
| H <sub>n</sub> GAA (2)-C3 | COO    | II | -16.65 | 0.08 |   |   |
| H <sub>n</sub> GAA (1)-C4 | OH (3) | I  | 6.93   | 0    |  |  |
| H <sub>n</sub> GAA (1)-C5 | OH (3) | II | -8.26  | 0    |  |  |

|                             |                   |    |        |   |                                                                                                                                                                                                                                    |                                                                                                                     |
|-----------------------------|-------------------|----|--------|---|------------------------------------------------------------------------------------------------------------------------------------------------------------------------------------------------------------------------------------|---------------------------------------------------------------------------------------------------------------------|
| H <sub>n</sub> GAA (1)-C6   | OH (4)            | I  | 5.55   | 0 | 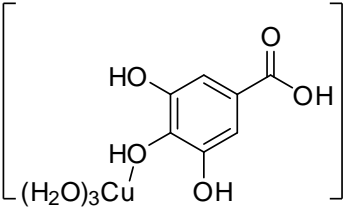 $\left[ \begin{array}{c} \text{HO} \\ \text{HO} \end{array} \text{C}_6\text{H}_2\text{COOH} \right]^{2+} \\ \text{(H}_2\text{O)}_3\text{Cu}$    | <br>2.191, 2.049, 2.048, 2.024   |
| H <sub>n</sub> GAA (1)-C7   | OH (4)            | II | -11.01 | 0 |  $\left[ \begin{array}{c} \text{HO} \\ \text{O} \end{array} \text{C}_6\text{H}_2\text{COOH} \right]^+ \\ \text{(H}_2\text{O)}_3\text{Cu}$        | <br>2.210, 2.151, 2.166, 1.923   |
| H <sub>n</sub> GAA (2)-C8   | OH (3),<br>OH (4) | I  | 3.61   | 0 |  $\left[ \begin{array}{c} \text{HO} \\ \text{HO} \end{array} \text{C}_6\text{H}_2\text{COOH} \right]^{2+} \\ \text{(H}_2\text{O)}_2\text{Cu-OH}$ | <br>2.102, 2.040, 2.150, 2.009   |
| H <sub>n</sub> GAA (2)-C9   | OH (3),<br>OH (4) | II | -13.00 | 0 |  $\left[ \begin{array}{c} \text{HO} \\ \text{HO} \end{array} \text{C}_6\text{H}_2\text{COOH} \right]^+ \\ \text{(H}_2\text{O)}_2\text{Cu-O}$   | <br>2.096, 2.056, 2.132, 1.920 |
| H <sub>n</sub> GAA N(2)-C10 | OH (3),<br>OH (4) | II | -12.77 | 0 |  $\left[ \begin{array}{c} \text{HO} \\ \text{O} \end{array} \text{C}_6\text{H}_2\text{COOH} \right]^+ \\ \text{(H}_2\text{O)}_2\text{Cu-OH}$   | <br>2.124, 2.050, 2.087, 1.926 |
|                             |                   |    |        |   |                                                                                                                                                                                                                                    |                                                                                                                     |

|                      |        |     |        |   |                                                                                      |                                                                                       |
|----------------------|--------|-----|--------|---|--------------------------------------------------------------------------------------|---------------------------------------------------------------------------------------|
| $H_{n-1}GAA^-(1)-C1$ | CO     | III | -10.93 | 0 | 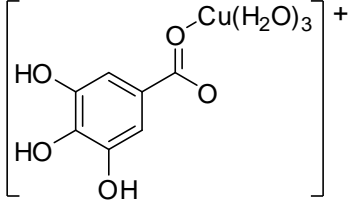   |    |
| $H_{n-1}GAA^-(2)-C2$ | COO    | III | -13.87 | 0 |    |    |
| $H_{n-1}GAA^-(1)-C3$ | OH (3) | III | 5.98   | 0 |   |   |
| $H_{n-1}GAA^-(1)-C4$ | OH (3) | IV  | -7.94  | 0 |  |  |
| $H_{n-1}GAA^-(1)-C5$ | OH (4) | III | 4.80   | 0 |  |  |

|                         |                   |     |        |   |                                                                                      |                                                                                       |
|-------------------------|-------------------|-----|--------|---|--------------------------------------------------------------------------------------|---------------------------------------------------------------------------------------|
| $H_{n-1}GAA^-(1)-C6$    | OH (4)            | IV  | -11.42 | 0 | 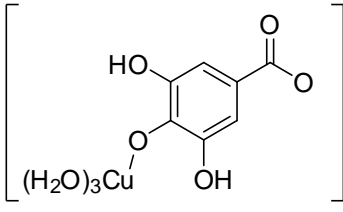   |    |
| $H_{n-1}GAA^-(2)-C7$    | OH (3),<br>OH (4) | III | 2.04   | 0 |    |    |
| $H_{n-1}GAA^-(2)-C8$    | OH (3),<br>OH (4) | IV  | -11.97 | 0 |    |    |
| $H_{n-1}GAA^-(2)-C9$    | OH (3),<br>OH (4) | IV  | -11.57 | 0 |  |  |
| $H_{n-2}GAA^{2-}(1)-C1$ | CO                | V   | -13.82 | 0 |  |  |

|                          |                   |    |        |      |                                                                                      |                                                                                       |
|--------------------------|-------------------|----|--------|------|--------------------------------------------------------------------------------------|---------------------------------------------------------------------------------------|
| $H_{n-2}GAA^{2-}$ (2)-C2 | COO               | V  | -18.48 | 1.86 | 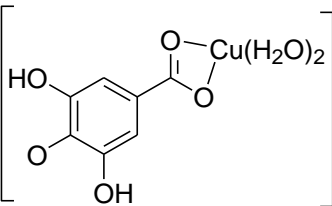   |    |
| $H_{n-2}GAA^{2-}$ (1)-C3 | OH (3)            | V  | -2.85  | 0    |    |    |
| $H_{n-2}GAA^{2-}$ (1)-C4 | OH (3)            | VI | -11.54 | 0    |   |   |
| $H_{n-2}GAA^{2-}$ (1)-C5 | OH (4)            | V  | -14.30 | 0    |  |  |
| $H_{n-2}GAA^{2-}$ (2)-C6 | OH (3),<br>OH (4) | V  | -14.45 | 0    |  |  |

|                                        |                   |    |        |       |                                                                                    |                                                                                     |
|----------------------------------------|-------------------|----|--------|-------|------------------------------------------------------------------------------------|-------------------------------------------------------------------------------------|
| $\text{H}_{n-2}\text{GAA}^{2-}$ (2)-C7 | OH (3),<br>OH (4) | VI | -20.83 | 98.05 | 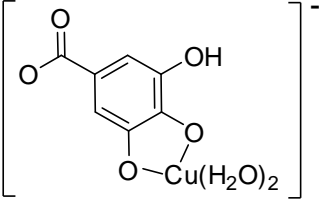 |  |
|----------------------------------------|-------------------|----|--------|-------|------------------------------------------------------------------------------------|-------------------------------------------------------------------------------------|

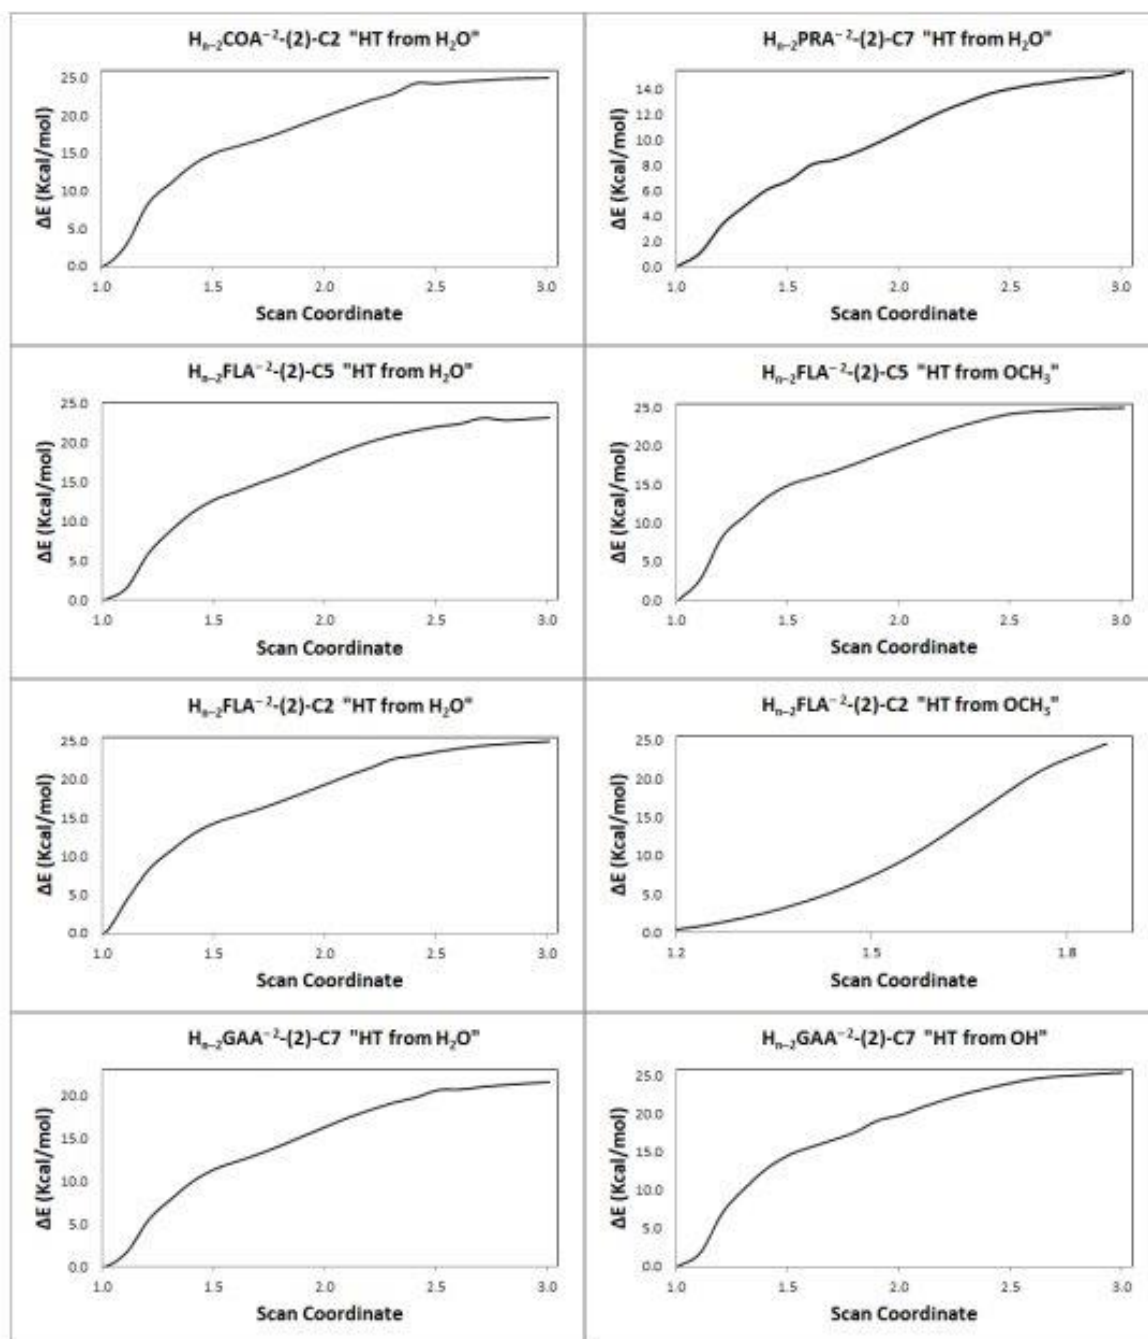

**Figure S3.** Energy scan for the *f*-HAT reactions between  $\cdot\text{OH}$  and PhAs-Cu(II) at 298.15 K. Solvent=water.



**Table S2.** Gibbs free energy of reaction ( $\Delta G$ , kcal/mol) and Gibbs free energy of activation ( $\Delta G^\ddagger$ , kcal/mol) for the direct RAF mechanism between PhAs-Cu(II) and  $\cdot\text{OH}$ .

Solvent=water.

| PhAs-Cu(II)                                   |       | $\Delta G$ | $\Delta G^\ddagger$ |
|-----------------------------------------------|-------|------------|---------------------|
| $\text{H}_{\text{n-2}}\text{COA}^{2-}$ (2)-C2 | RAF-1 | -8.10      | -1.74               |
| $\text{H}_{\text{n-2}}\text{COA}^{2-}$ (2)-C2 | RAF-2 | -12.92     | -1.38               |
| $\text{H}_{\text{n-2}}\text{COA}^{2-}$ (2)-C2 | RAF-3 | -17.08     | -6.81               |
| $\text{H}_{\text{n-2}}\text{COA}^{2-}$ (2)-C2 | RAF-4 | -13.63     | -6.28               |
| $\text{H}_{\text{n-2}}\text{FLA}^{2-}$ (2)-C5 | RAF-1 | -10.16     | -2.48               |
| $\text{H}_{\text{n-2}}\text{FLA}^{2-}$ (2)-C5 | RAF-2 | NF         | --                  |
| $\text{H}_{\text{n-2}}\text{FLA}^{2-}$ (2)-C5 | RAF-3 | -18.40     | -4.78               |
| $\text{H}_{\text{n-2}}\text{FLA}^{2-}$ (2)-C5 | RAF-4 | -20.79     | -8.05               |
| $\text{H}_{\text{n-2}}\text{FLA}^{2-}$ (2)-C5 | RAF-5 | -15.21     | -4.43               |
| $\text{H}_{\text{n-2}}\text{FLA}^{2-}$ (2)-C5 | RAF-6 | -17.52     | -6.38               |
| $\text{H}_{\text{n-2}}\text{FLA}^{2-}$ (2)-C2 | RAF-1 | -8.11      | -3.01               |
| $\text{H}_{\text{n-2}}\text{FLA}^{2-}$ (2)-C2 | RAF-2 | -15.39     | -3.32               |
| $\text{H}_{\text{n-2}}\text{FLA}^{2-}$ (2)-C2 | RAF-3 | -20.84     | -7.25               |
| $\text{H}_{\text{n-2}}\text{FLA}^{2-}$ (2)-C2 | RAF-4 | -15.78     | -9.98               |
| $\text{H}_{\text{n-2}}\text{FLA}^{2-}$ (2)-C2 | RAF-5 | -14.96     | -6.56               |
| $\text{H}_{\text{n-2}}\text{FLA}^{2-}$ (2)-C2 | RAF-6 | -16.08     | -5.88               |
| $\text{H}_{\text{n-2}}\text{PRA}^{2-}$ (2)-C7 | RAF-1 | -15.32     | -6.22               |
| $\text{H}_{\text{n-2}}\text{PRA}^{2-}$ (2)-C7 | RAF-2 | -17.03     | -8.33               |
| $\text{H}_{\text{n-2}}\text{PRA}^{2-}$ (2)-C7 | RAF-3 | -17.50     | -12.01              |
| $\text{H}_{\text{n-2}}\text{PRA}^{2-}$ (2)-C7 | RAF-4 | -18.97     | -12.62              |
| $\text{H}_{\text{n-2}}\text{PRA}^{2-}$ (2)-C7 | RAF-5 | -14.90     | -7.18               |
| $\text{H}_{\text{n-2}}\text{PRA}^{2-}$ (2)-C7 | RAF-6 | -19.63     | -10.62              |
| $\text{H}_{\text{n-2}}\text{GAA}^{2-}$ (2)-C7 | RAF-1 | -14.88     | -6.36               |
| $\text{H}_{\text{n-2}}\text{GAA}^{2-}$ (2)-C7 | RAF-2 | -18.24     | -7.63               |
| $\text{H}_{\text{n-2}}\text{GAA}^{2-}$ (2)-C7 | RAF-3 | -15.82     | -10.74              |
| $\text{H}_{\text{n-2}}\text{GAA}^{2-}$ (2)-C7 | RAF-4 | -19.96     | -13.07              |
| $\text{H}_{\text{n-2}}\text{GAA}^{2-}$ (2)-C7 | RAF-5 | -19.19     | -9.09               |
| $\text{H}_{\text{n-2}}\text{GAA}^{2-}$ (2)-C7 | RAF-6 | -17.74     | -9.46               |

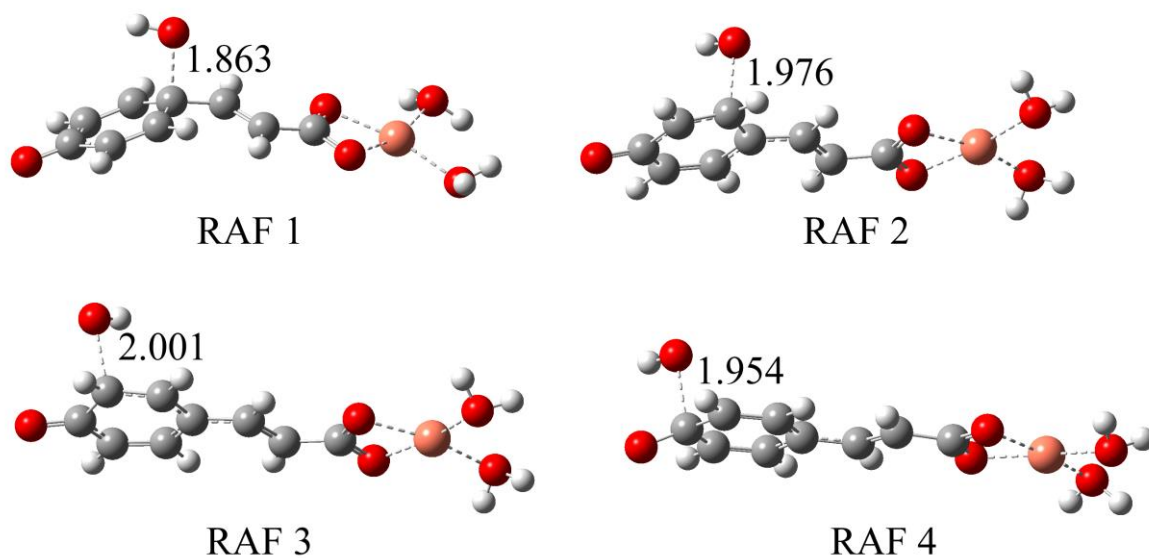

**Figure S4.** Transition states structures of exergonic RAF reactions between  $\cdot\text{OH}$  and  $\text{H}_n\text{-}_2\text{COA}^{2-}\text{-(2)-C2}$  at 298.15 K. Solvent=water.

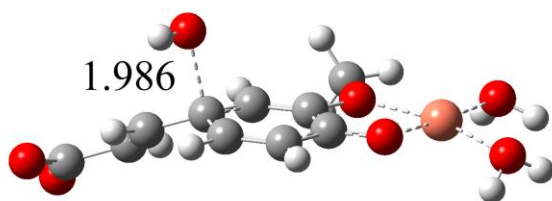

RAF 1

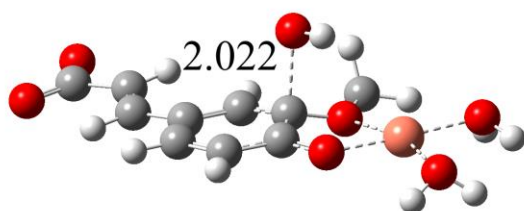

RAF 3

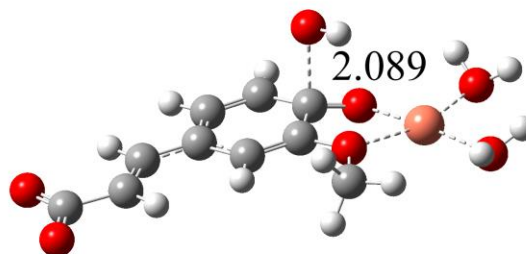

RAF 4

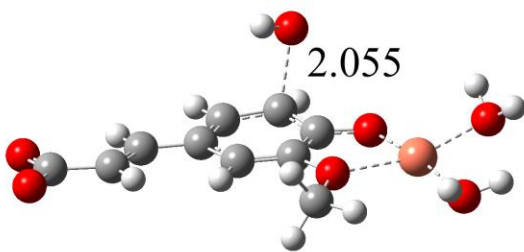

RAF 5

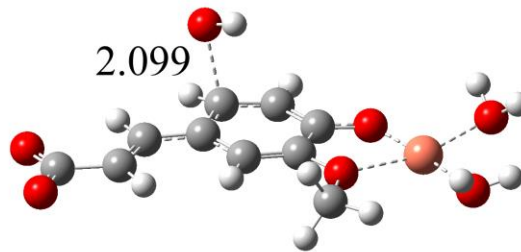

RAF 6

**Figure S5.** Transition states structures of exergonic RAF reactions between  $\cdot\text{OH}$  and  $\text{H}_n\text{-}_2\text{FLA}^{2-}\text{-(2)-C5}$  complexes at 298.15 K. Solvent=water.

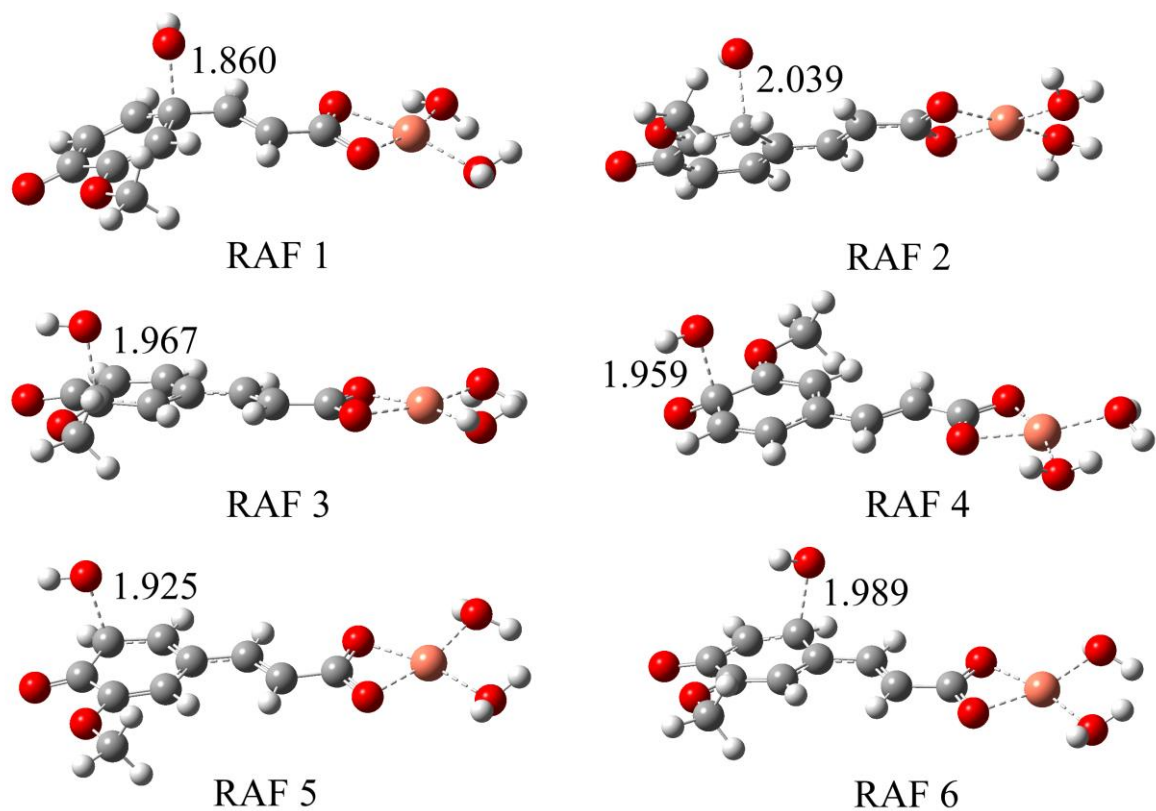

**Figure S6.** Transition states structures of exergonic RAF reactions between  $\cdot\text{OH}$  and  $\text{H}_{\text{n-2}}\text{FLA}^{2-}-(2)\text{-C2}$  complexes at 298.15 K. Solvent=water.

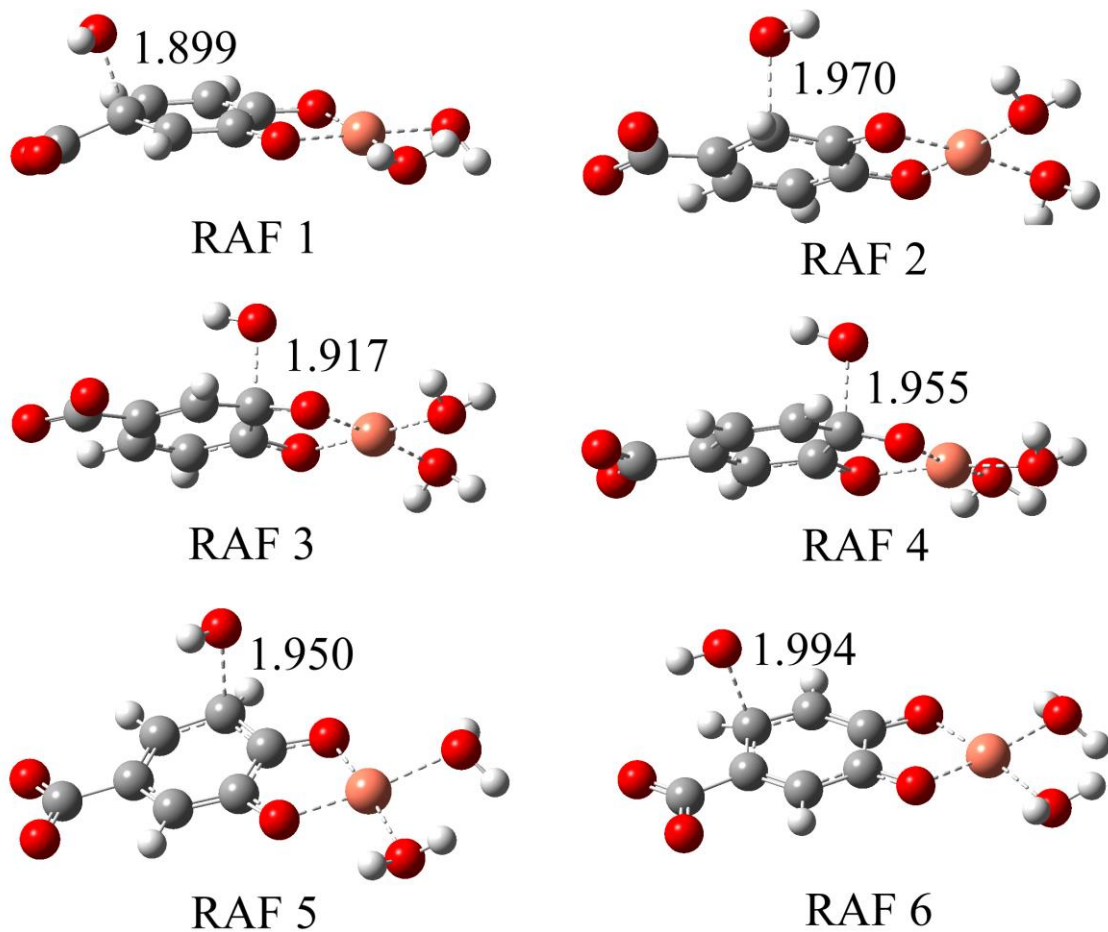

**Figure S7.** Transition states structures of exergonic RAF reactions between  $\cdot\text{OH}$  and  $\text{H}_n\text{-}_2\text{PRA}^{2-}\text{-(2)-C7}$  complexes at 298.15 K. Solvent=water.

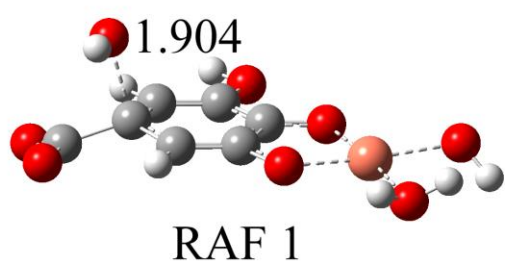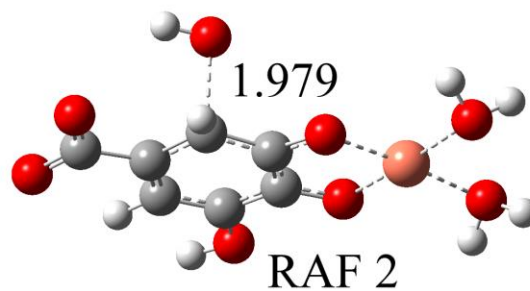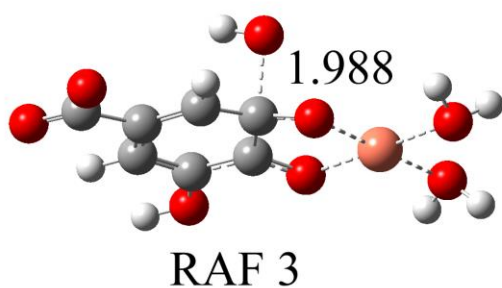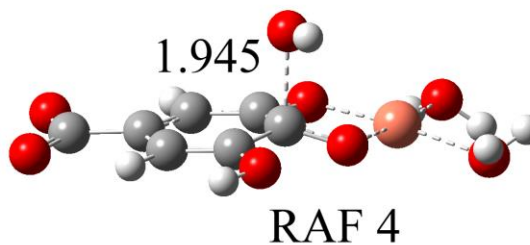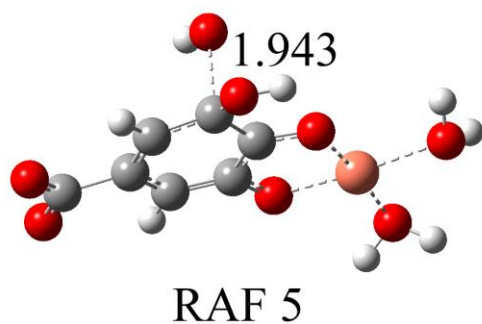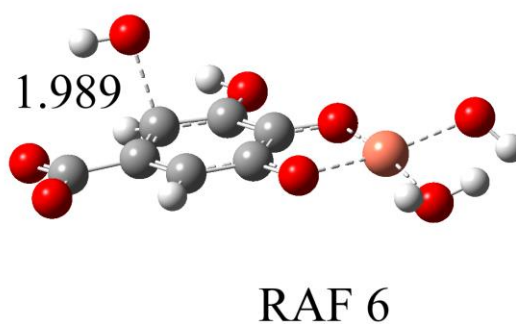

**Figure S8.** Transition states structures of exergonic RAF reactions between  $\cdot\text{OH}$  and  $\text{H}_n\text{-}_2\text{GAA}^{2-}\text{-(2)-C7}$  complexes at 298.15 K. Solvent=water.
